# Supplementary material
Source: Springer Nature journal article supplement (https://www.springermedizin.de/resource/supplementary/12889_2009_2532_MOESM1_ESM.pdf/9486328)

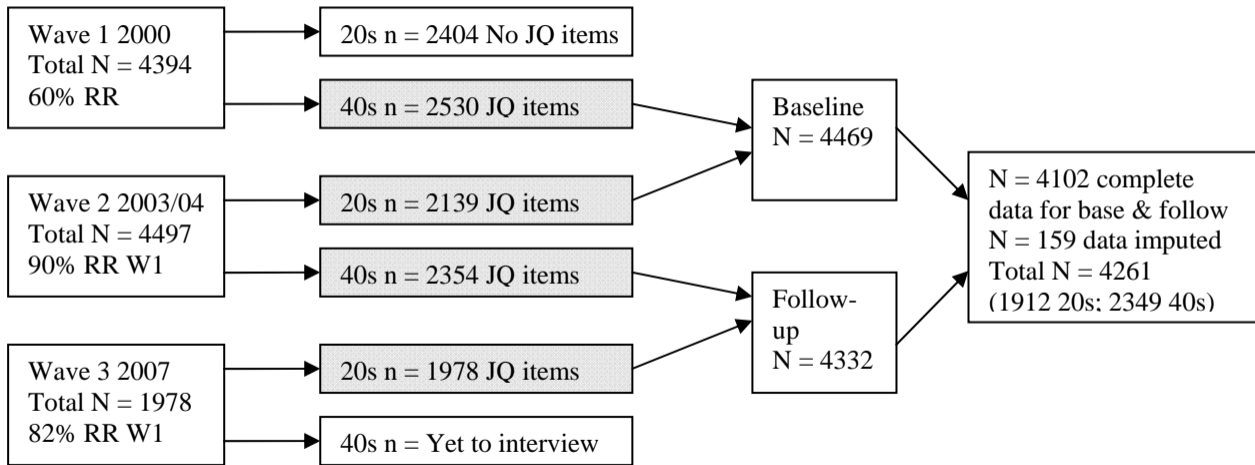

Supplement: MOESM1 [file 9486328]
